# Supplementary material for: Sclerostin small-molecule inhibitors promote osteogenesis by activating canonical Wnt and BMP pathways
Source: eLife. 2023 Aug 10;12:e63402. doi: 10.7554/eLife.63402 (PMC10431921; doi:10.7554/eLife.63402)
Supplement: Figure 1—source data 1. [file elife-63402-fig1-data1.xlsx]

## Sheet: Page1
Compound	FF	R	FF/R
NT	284	15057	0.0188617	284	0.01557
Wnt10	248	5136	0.0482866	248	0.01753
A03	122	22522	0.00541693	122	0.01688
A04	222	3660	0.0606557	222	0.0139
A05	302	4372	0.0690759	302	0.0203
A06	118	3588	0.0328874	118	0.0255
A07	404	5234	0.0771876	404	0.02872
A08	246	4308	0.0571031	246	0.01745
A09	198	5588	0.0354331	198	0.0084
A10	212	17557	0.012075	212	0.0274
A11	300	4608	0.0651042	300	0.0214
A12	140	4676	0.0299401	140	0.01141
F1	1454	6996	0.207833	2494	0.0252
A14	636	9794	0.0649377	636	0.0283
A15	210	4078	0.0514958	210	0.01257
A16	300	6178	0.0485594	300	0.01256
A17	352	3502	0.100514	352	0.0238
A18	276	11326	0.0243687	276	0.022
A19	184	2610	0.0704981	184	0.036
VA1	1086	4638	0.234153	1186	0.02147
A21	302	3520	0.0857955	302	0.0111
A22	272	4336	0.0627306	272	0.01115
B03	372	9958	0.0373569	372	0.0285
B04	380	8184	0.0464321	380	0.0321
B05	986	6312	0.15621	986	0.02122
B06	446	9202	0.0484677	446	0.0227
B07	224	6532	0.0342927	224	0.0265
B08	982	14365	0.0683606	982	0.01014
B09	296	5948	0.0497646	296	0.02493
B10	386	7570	0.0509908	386	0.02271
B11	784	11906	0.0658492	784	0.0279
B12	438	9098	0.0481424	438	0.0171
B13	294	5226	0.0562572	294	0.01141
B14	418	19863	0.0210442	418	0.0252
B15	576	9806	0.0587395	576	0.0183
B16	664	15087	0.0440114	664	0.01257
B17	316	6286	0.0502704	316	0.01256
B18	400	5418	0.073828	400	0.0138
B19	738	6104	0.120904	738	0.022
B20	416	8284	0.0502173	416	0.016
B21	334	7860	0.0424936	334	0.02147
B22	344	4718	0.0729123	344	0.0111
C03	278	6268	0.0443523	278	0.01115
C04	202	6848	0.0294977	202	0.0285
C05	222	19307	0.0114984	222	0.01141
C06	300	12838	0.0233681	300	0.0252
C07	2764	8648	0.319611	2664	0.0283
C08	382	21212	0.0180087	382	0.02257
C09	474	11872	0.0399259	474	0.01256
