# Supplementary material for: Sclerostin small-molecule inhibitors promote osteogenesis by activating canonical Wnt and BMP pathways
Source: eLife. 2023 Aug 10;12:e63402. doi: 10.7554/eLife.63402 (PMC10431921; doi:10.7554/eLife.63402)
Supplement: Figure 2—source data 3. [file elife-63402-fig2-data3.xlsx]

## Sheet: MC3T3-N5
F	FF/R	Mean	Std.Dev	Std.Err	Fold Increase	corrected-sem
wnt 10 ng/ml+0.0uM	0.00844292	0.00637805	0.00292017	0.000973088	1	15.2568
	0.00580632
	0.00281318
	0.00390632
	0.00431318
wnt 10 ng/ml+0.5uM	0.018417	0.0125775	0.00825829	0.00317941	1.97199	49.8492
	0.0177284
	0.00549796
	0.0206284
	0.00673796
wnt 10 ng/ml+1.0uM	0.0167332	0.0255218	0.0124289	0.00473517	4.0015	74.2417
	0.022768
	0.0159104
	0.039468
	0.0343104
wnt 10 ng/ml+2.0uM	0.0544199	0.0330194	0.0302649	0.0100403	5.17704	157.42
	0.0585251
	0.0119188
	0.0375251
	0.0116188
wnt 10 ng/ml+5.0uM	0.0202182	0.0348996	0.0207627	0.0151574	5.47183	237.65
	0.0400473
	0.10881
	0.0374473
	0.049581
wnt 10 ng/ml+10.0uM	0.0496929	0.0598038	0.0142991	0.00542116	9.37651	0.849972
	0.0605046
	0.0794148
	0.0536246
	0.0699148
VA1-wnt 10 ng/ml+0.0uM	0.00460523	0.00423093	0.000529335	0.00328031	1	0.514313
	0.00843963
	0.00361664
	0.0209436
	0.00385664
VA1-wnt 10 ng/ml+0.5uM	0.0228315	0.0244875	0.00234192	0.00485447	5.78772	0.761121
	0.00471533
	0.0244435
	0.00482533
	0.0261435
VA1-wnt 10 ng/ml+1.0uM	0.0203845	0.0498624	0.041688	0.0150167	11.7852	2.35444
	0.0204649
	0.0864402
	0.0246649
	0.0793402
VA1-wnt 10 ng/ml+2.0uM	0.0748764	0.0685531	0.0089426	0.0138339	16.2028	2.16899
	0.0119188
	0.0676297												ALP activity (nmol/ug) versus treatments
	0.0128188
	0.0622297
VA1-wnt 10 ng/ml+5.0uM	0.0460178	0.0700015	0.0339182	0.0185761	16.5452	2.91251
	0.115257
	0.0685853
	0.153257
	0.0939853
VA1-wnt 10 ng/ml+10.0uM	0.107023	0.101675	0.00756439	0.0235109	24.0312	3.68623
	0.102949
	0.00440574
	0.146949
	0.0963257
CO7-wnt 10 ng/ml+0.0uM	0.00878953	0.0078899	0.00127227	0.00371568	1	0.582573
	0.00288896
	0.00687027
	0.0243263
	0.00699027
CO7-wnt 10 ng/ml+0.5uM	0.00499162	0.0123547	0.010413	0.00362812	1.56589	0.568845
	0.0226696
	0.0185178
	0.0263696
	0.0197178
CO7-wnt 10 ng/ml+1.0uM	0.0159104	0.0302144	0.020229	0.0129718	3.8295	2.03383
	0.0901845
	0.0736185
	0.0424845
	0.0445185
CO7-wnt 10 ng/ml+2.0uM	0.0141047	0.045365	0.0442088	0.0114099	5.74976	1.78893
	0.0690798
	0.0452253
	0.0680598
	0.0766253
CO7-wnt 10 ng/ml+5.0uM	0.12063	0.100897	0.0279054	0.00845197	12.7882	1.32517
	0.0789943
	0.110465
	0.109894
	0.0811653
CO7-wnt 10 ng/ml+10.0uM	0.141251	0.121358	0.0281324	0.0116992	15.3814	1.8343
	0.0789943
	0.110465
	0.0775943
	0.101465

## Sheet: BMSC-N5
F	FF/R	Mean	Std.Dev	Std.Err	Fold Increase	corrected-SEM
wnt 10 ng/ml+0.0uM	0.00195427	0.00172133	0.000329427	0.000260737	1	0.151474
	0.00267984
	0.00129839
	0.00238584
	0.00148839
wnt 10 ng/ml+0.5uM	0.0107206	0.00635894	0.00616839	0.00189708	3.6942	1.1021
	0.00818235
	0.00175723
	0.00943235
	0.00199723
wnt 10 ng/ml+1.0uM	0.00772303	0.00786114	0.000195317	0.00240504	4.5669	1.3972
	0.0158048
	0.00734325
	0.0188048
	0.00799925
wnt 10 ng/ml+2.0uM	0.0277073	0.0166892	0.015582	0.00527531	9.6955	3.06467
	0.0270116
	0.005501
	0.0266116
	0.005671
wnt 10 ng/ml+5.0uM	0.00933146	0.0347258	0.035913	0.00953207	20.1738	5.53762
	0.0184834
	0.0502201									ALP activity (nmol/ug) versus treatments
	0.0399834
	0.0601201
wnt 10 ng/ml+10.0uM	0.0229352	0.0362941	0.0188923	0.00529031	21.0849	3.07339
	0.0279252
	0.036653
	0.0479252
	0.049653
VA1-wnt 10 ng/ml+0.0uM	0.00212549	0.00206235	8.9289e-05	0.000441057	1	0.25623
	0.00389521
	0.00166922
	0.00347521
	0.00199922
VA1-wnt 10 ng/ml+0.5uM	0.00583551	0.00407591	0.00248846	0.00227029	1.97634	1.31891
	0.0105376
	0.00217631
	0.0136376
	0.00231631
VA1-wnt 10 ng/ml+1.0uM	0.0112816	0.0106345	0.000915191	0.000346539	5.15647	0.20132
	0.00940825
	0.00944532
	0.00966825
	0.00998732
VA1-wnt 10 ng/ml+2.0uM	0.0398955	0.0227492	0.0242484	0.00774107	11.0307	4.49714
	0.0345583
	0.005501
	0.0364283
	0.005603
VA1-wnt 10 ng/ml+5.0uM	0.0312137	0.0430347	0.0167175	0.00723153	20.8668	4.20113
	0.021239
	0.0531957
	0.023469
	0.0548557
VA1-wnt 10 ng/ml+10.0uM	0.0316548	0.0398348	0.0115682	0.00343771	19.3152	1.99713
	0.0493954
	0.0475147
	0.0498954
	0.0480147
CO7-wnt 10 ng/ml+0.0uM	0.00203342	0.00201839	2.12507e-05	0.000696422	1	0.404583
	0.00405671
	0.00133337
	0.00498671
	0.00200337
CO7-wnt 10 ng/ml+0.5uM	0.0031709	0.00282236	0.000492904	0.00164634	1.39832	0.956436
	0.00928908
	0.00230382
	0.00939908
	0.00247382
CO7-wnt 10 ng/ml+1.0uM	0.0104629	0.00901507	0.00204754	0.000553446	4.46646	0.321522
	0.00854669
	0.00734325
	0.00876369
	0.00756725
CO7-wnt 10 ng/ml+2.0uM	0.0416236	0.0241632	0.0246927	0.00761104	11.9715	4.4216
	0.0339778
	0.00650986
	0.0361778
	0.00670286
CO7-wnt 10 ng/ml+5.0uM	0.031883	0.0444591	0.0177853	0.00803809	22.027	4.66969
	0.0208732
	0.0556752
	0.0209932
	0.0570352
CO7-wnt 10 ng/ml+10.0uM	0.0364589	0.0519257	0.0218734	0.00557063	25.7263	3.23624
	0.050984
	0.0651926
	0.052984
	0.0673926
