# Supplementary material for: Sclerostin small-molecule inhibitors promote osteogenesis by activating canonical Wnt and BMP pathways
Source: eLife. 2023 Aug 10;12:e63402. doi: 10.7554/eLife.63402 (PMC10431921; doi:10.7554/eLife.63402)
Supplement: Figure 2—source data 4. [file elife-63402-fig2-data4.xlsx]

## Sheet: Sheet1
	Ligand	F1	VA1	C07	Ligand		F1		VA1		C07
1	25356	24846	25381	25117	25362.7	1033.02	24979.3	1903.51	25315.7	452.551	25314.7	706.551
	24333	26946	24834	24728
	26399	23146	25732	26099
2	25846	23841	23489	25110	25088.7	1578.69	24382.7	659.458	24333.3	1911.86	25159	696.193
	23274	25117	26522	24421
	26146	24190	22989	25006
3	24882	23926	24680	23438	24267.7	1925.46	24286.7	491.123	25181.3	437.153	24237	676.987
	22110	24846	25381	24521
	25811	24088	25483	23983
4	20222	24227	25853	23882	20371.3	303.892	24201	333.76	24982.3	941.616	23387	939.057
	20171	24521	25111	21990
	20721	23855	23983	23693
5	16368	24111	24853	19367	16344.7	151.355	23773	490.835	24672.3	1378.91	20508.2	2160.44
	16483	23998	25952	19002
	16183	23210	23212	19971
6	12648	22726	23119	18119	12685	415.737	22832.7	243.225	23957	1121.48	18494.8	1252.52
	12289	22661	25231	18888
	13118	23111	23521	17001
7	8150	21212	25281	17826	8163.67	220.817	21505	715.973	24240	943.569	17520.2	471.044
	7950	22321	23441	18001
	8391	20982	23998	17253
8	6386	21243	23551	16117	6440.33	282.447	21324.7	380.137	23781.3	703.378	16443.5	569.93
	6189	20992	24571	15983
	6746	21739	23222	16421
9	4267	20946	23942	14758	4240.67	194.839	20513	507.861	23979	1004.01	14758.5	1177.92
	4421	20639	22994	14021
	4034	19954	25001	13834
10	2164	18764	22991	12648	2135.67	105.396	19387	679.156	23500.7	1017.25	12972.2	667.289
	2019	19286	24672	12289
	2224	20111	22839	13118
Group	Ligand		F1		VA1		C07		Ligand	ligand		F1	F1		VA1	VA1		C07	C07		Group	ligand	F1	VA1	C07
1	25362.7	1033.02	24979.3	1903.51	25315.7	452.551	25314.7	706.551	1	100	6.1	1	100	8.1	1	100	9.1	1	100	7.1	0	100	100	100	100
2	25088.7	1578.69	24382.7	659.458	24333.3	1911.86	25159	696.193	0.989197	98.92	9.1	0.976114	97.61	6.1	0.961197	96.12	8.1	0.993851	99.38	10.1	1.95312	98.92	97.61	96.12	99.38
3	23601	1119.41	24286.7	491.123	25181.3	437.153	24237	676.987	0.930541	93.05	5.3	0.97227	97.22	9.3	0.994694	99.46	6.3	0.957429	95.74	5.3	3.90625	93.05	97.22	99.46	95.74
4	20371.3	303.892	24201	333.76	24982.3	941.616	23387	939.057	0.803202	80.32	6.2	0.968841	96.88	4.2	0.986833	98.68	7.2	0.923852	92.38	8.2	7.8125	80.32	96.88	98.68	92.38
5	16344.7	151.355	23773	490.835	24672.3	1378.91	20508.2	2160.44	0.644438	64.4	7.9	0.951707	95.17	6.9	0.974588	97.45	4.9	0.810133	81.01	6.9	15.625	64.4	95.17	97.45	81.01
6	12685	415.737	22832.7	243.225	23957	1121.48	18494.8	1252.52	0.500145	50.01	8.7	0.914062	91.41	5.7	0.946331	94.63	7.7	0.730594	73.06	6.7	31.25	50.01	91.41	94.63	73.06
7	8163.67	220.817	21505	715.973	24240	943.569	17520.2	471.044	0.321877	32.19	5.9	0.860912	86.09	8.9	0.95751	95.75	6.9	0.692099	69.21	8.9	62.5	32.19	86.09	95.75	69.21
8	6440.33	282.447	21324.7	380.137	23781.3	703.378	16443.5	569.93	0.25393	25.39	7.6	0.853692	85.37	6.6	0.939392	93.93	7.6	0.649564	64.96	8.6	125	25.39	85.37	93.93	64.96
9	4240.67	194.839	20513	507.861	23979	1004.01	14758.5	1177.92	0.167201	16.72	4.2	0.821199	82.12	5.2	0.9472	94.7	7.2	0.583002	58.3	8.2	250	16.72	82.12	94.7	58.3
10	2135.67	105.396	19387	679.156	23500.7	1017.25	12972.2	667.289	0.0842051	8.42	3.1	0.776122	77.61	7.1	0.928305	92.83	6.1	0.51244	51.24	7.1	500	8.42	77.61	92.83	51.24
