# Supplementary material for: Sclerostin small-molecule inhibitors promote osteogenesis by activating canonical Wnt and BMP pathways
Source: eLife. 2023 Aug 10;12:e63402. doi: 10.7554/eLife.63402 (PMC10431921; doi:10.7554/eLife.63402)
Supplement: Figure 2—source data 5. [file elife-63402-fig2-data5.xlsx]

## Sheet: Design
Exp:- Purpose: 1. Dose compounds potentiate WNT3a in wnt reporter assay
D0	Plate 20,000 cells/well in 2 - 24 well well plate in 2% DMEM
D1	Transfect with luciferase reporter constructs (TCF-LEF)
D2	Remove media and replace with 500 ul of media containing WNT Protein +/- compound
D4	Read Luminescence
Cells	MC3T3 or MSCs
	20K: Resuspend 4x10^5 cells in 8 mls 2% DMEM
Lipofectamine Dilution
	ul of lipo/ 24 ul optimem	vol lipofectamine (ul)	vol optimem (ul)	total vol (ul)
	0.5	9.5	465.5	475
DNA Dilution
	DNA Construct stock: 100 ng/ul, dilute to 100 ng/well
	vol plasmid (ul)	vol optimem (ul)	total vol (ul)
	18	432	450
Transfection Complex
	vol diluted lipo (ul)	Vol diluted plasmid 250 ng/well (ul)	total vol (ul)	Vol per well (ul)
	450	450	900	50
Protocol
1. Add 400 ul of cell suspension to the wells in 2% DMEM and incubate over night
NEXT DAY
2. Add diluted Lipofectamine to diluted DNA construct and gently mix by pipetting
3. Incubate for 5 minutes at room temp
4. Pipette 50 ul of DNA-Lipofectamine complex per well in 24 well plate
5. incubate 24 hrs and change media to 500 ul of WNT containing 2% media
6. Incubate 2 days and read luminescence
** All reagents must be at room temperature
All groups were run in triplicate
Media Preparation
Dilute 1 vial of lyophilized protein (10ug) in 0.25 ml of sterile 1X PBS w/ 0.1% BSA making 40 ug/ml stock
Working stock (10ug/ml): dilute stock 1:4 by taking 9 ul of stock protein into 27 ul of PBS w/ 0.1% BSA
WNT (ng/ml)	Vol 2% DMEM (ml)	Vol WNT (ul)	DMSO ul (1 ul/ml)
0	2	0	2
5	2	1	2
10	2	2	2
20	2	4	2
40	2	8	2
80	2	16	2
Note:
Lipofectamine was purchased from LifeTech. Catalog#11668019
Wnt3a was from R&D;
TCF/LEF Kit was from Qiagen

## Sheet: MC3T3 cells
F	Firefly	Renilla	FF/R	Mean	Std.Dev	Std.Err	Fold Increase	corrected-sem	F1		VA1
wnt 10 ng/ml	660	78172	0.00844292	0.00568747	0.00281675	0.00162625	1	0.285936	1	0.285936	1	0.264835
	420	72335	0.00580632						2.44065	0.302302	2.41217	0.391379
	330	117305	0.00281318						3.24758	0.117041	3.91879	0.0615589
0.5 uM	638	34642	0.018417	0.0138811	0.00726818	0.00419629	2.44065	0.302302	7.31807	0.357952	10.3974	0.400987
	1488	83933	0.0177284						9.90924	0.476294	13.7386	0.26805
	542	98582	0.00549796						11.1129	0.13742	16.7186	0.131288
1.0 uM	1278	76375	0.0167332	0.0184705	0.00374437	0.00216181	3.24758	0.117041
	992	43570	0.022768
	1048	65869	0.0159104
2.0 uM	1616	29695	0.0544199	0.0416213	0.0258048	0.0148984	7.31807	0.357952
	3484	59530	0.0585251
	776	65107	0.0119188
5 uM	1442	71322	0.0202182	0.0563586	0.0464939	0.0268433	9.90924	0.476294
	2778	69368	0.0400473
	9726	89385	0.10881
10 uM	1804	36303	0.0496929	0.0632041	0.0150437	0.0086855	11.1129	0.13742
	2784	46013	0.0605046
	3474	43745	0.0794148
VA1	360	78172	0.00460523	0.00555383	0.00254759	0.00147085	1	0.264835
wnt 10 ng/ml	440	52135	0.00843963
	370	102305	0.00361664
	438	34642	0.0126436	0.0133968	0.00908153	0.00524322	2.41217	0.391379
0.5 uM	1688	73933	0.0228315
	512	108582	0.00471533
	1378	56375	0.0244435	0.0217643	0.00232058	0.00133979	3.91879	0.0615589
1.0 uM	1092	53570	0.0203845
	1348	65869	0.0204649
	1616	18695	0.0864402	0.0577452	0.0401057	0.0231551	10.3974	0.400987
2.5 uM	3484	46530	0.0748764
	776	65107	0.0119188
	1442	21322	0.0676297	0.0763016	0.0354251	0.0204527	13.7386	0.26805
5 uM	2778	60368	0.0460178
	9726	84385	0.115257
	1804	26303	0.0685853	0.0928524	0.0211145	0.0121904	16.7186	0.131288
10 uM	2784	26013	0.107023
	3474	33745	0.102949
	340	77172	0.00440574	0.00536141	0.00306417	0.0017691	1	0.329969
C07	460	52335	0.00878953
wnt 10 ng/ml	310	107305	0.00288896
	238	34642	0.00687027	0.0106627	0.00824936	0.00476277	1.98879	0.446674
	1488	73933	0.0201263
0.5 uM	542	108582	0.00499162
	1278	56375	0.0226696	0.0190326	0.0034089	0.00196813	3.54992	0.103408
	992	53570	0.0185178
1.0 uM	1048	65869	0.0159104
	1686	18695	0.0901845	0.0593026	0.0400093	0.0230994	11.061	0.389517
	3477	47230	0.0736185
2.5 uM	876	62107	0.0141047
	1542	22322	0.0690798	0.0783116	0.0385405	0.0222513	14.6065	0.284139
	2798	61868	0.0452253
5 uM	9926	82285	0.12063
	1904	24103	0.0789943	0.110237	0.0311288	0.0179722	20.5611	0.163033
	2984	27013	0.110465
10 uM	4484	31745	0.141251

## Sheet: BMSC-plot
F	Firefly	Renilla	FF/R	Mean	Std.Dev	Std.Err	Fold Increase
wnt 10 ng/ml	198.6	101624	0.00195427	0.0019775	0.000691017	0.000398959	1	0.201749
	252	94035.5	0.00267984
	198	152496	0.00129839
0.5 uM	482.8	45034.6	0.0107206	0.00688674	0.00462003	0.00266738	3.48255	0.387321
	892.8	109113	0.00818235
	225.2	128157	0.00175723
1.0 uM	766.8	99287.5	0.00772303	0.0102904	0.00477942	0.0027594	5.20372	0.268154
	895.2	56641	0.0158048
	628.8	85629.7	0.00734325
2.0 uM	1069.6	38603.5	0.0277073	0.0200733	0.0126248	0.00728892	10.1509	0.363115
	2090.4	77389	0.0270116
	465.6	84639.1	0.005501
5 uM	865.2	92718.6	0.00933146	0.0260116	0.0214587	0.0123892	13.1538	0.476294
	1666.8	90178.4	0.0184834
	5835.6	116200	0.0502201
10 uM	1082.4	47193.9	0.0229352	0.0291711	0.00694326	0.00400869	14.7515	0.13742
	1670.4	59816.9	0.0279252
	2084.4	56868.5	0.036653
VA1
wnt 10 ng/ml	216	101624	0.00212549	0.00256331	0.00117581	0.000678854	1	0.264835
	264	67775.5	0.00389521
	222	132996	0.00166922
0.5 uM	262.8	45034.6	0.00583551	0.00618314	0.00419148	0.00241995	2.41217	0.391379
	1012.8	96112.9	0.0105376
	307.2	141157	0.00217631
1.0 uM	826.8	73287.5	0.0112816	0.0100451	0.00107104	0.000618363	3.91879	0.0615589
	655.2	69641	0.00940825
	808.8	85629.7	0.00944532
2.0 uM	969.6	24303.5	0.0398955	0.0266516	0.0185103	0.0106869	10.3974	0.400987
	2090.4	60489	0.0345583
	465.6	84639.1	0.005501
5 uM	865.2	27718.6	0.0312137	0.0352161	0.01635	0.0094397	13.7386	0.26805
	1666.8	78478.4	0.021239
	5835.6	109700	0.0531957
10 uM	1082.4	34193.9	0.0316548	0.042855	0.00974514	0.00562636	16.7186	0.131288
	1670.4	33816.9	0.0493954
	2084.4	43868.5	0.0475147
C07
wnt 10 ng/ml	204	100324	0.00203342	0.0024745	0.00141423	0.000816508	1	0.329969
	276	68035.5	0.00405671
	186	139496	0.00133337
0.5 uM	142.8	45034.6	0.0031709	0.00492127	0.0038074	0.0021982	1.98879	0.446674
	892.8	96112.9	0.00928908
	325.2	141157	0.00230382
1.0 uM	766.8	73287.5	0.0104629	0.00878428	0.00157334	0.000908369	3.54992	0.103408
	595.2	69641	0.00854669
	628.8	85629.7	0.00734325
2.0 uM	1011.6	24303.5	0.0416236	0.0273704	0.0184658	0.0106613	11.061	0.389517
	2086.2	61399	0.0339778
	525.6	80739.1	0.00650986
5 uM	925.2	29018.6	0.031883	0.0361438	0.0177879	0.0102699	14.6065	0.284139
	1678.8	80428.4	0.0208732
	5955.6	106970	0.0556752
10 uM	1142.4	31333.9	0.0364589	0.0508785	0.0143671	0.00829486	20.5611	0.163033
	1790.4	35116.9	0.050984
	2690.4	41268.5	0.0651926
