# Supplementary material for: Sclerostin small-molecule inhibitors promote osteogenesis by activating canonical Wnt and BMP pathways
Source: eLife. 2023 Aug 10;12:e63402. doi: 10.7554/eLife.63402 (PMC10431921; doi:10.7554/eLife.63402)
Supplement: Figure 3—source data 3. [file elife-63402-fig3-data3.xlsx]

## Sheet: raw-data
NT	0.0622239	0.00222395	0.122224	0.06	0.26	0.0622239
BMP-2(0ng/ml)	0.233692	0.163692	0.303692	0.07	0.1	0.233692
BMP-2(0ng/ml)+F1	0.131838	-0.0681621	0.331838	0.2	0.1	0.131838
BMP-2(0ng/ml)+VA1	0.502192	0.102192	0.902192	0.4	0.3	0.502192
BMP-2(0ng/ml)+C07	0.45597	-0.0940304	1.00597	0.55	0.15	0.45597
BMP-2(50ng/ml)	1.58859	0.788591	2.38859	0.8	0.33	1.58859
BMP-2(50ng/ml)+F1	1.33148	-0.0685165	2.73148	1.4	0.14	1.33148
BMP-2(50ng/ml)+VA1	1.9818	0.081801	3.8818	1.9	0.16	1.9818
BMP-2(50ng/ml)+C07	2.48908	0.28908	4.68908	2.2	0.202	2.48908
BMP-2(100ng/ml)	1.71985	-0.340155	3.77985	2.06	0.206	1.71985
BMP-2(100ng/ml)+F1	2.41061	-0.119395	4.94061	2.53	0.253	2.41061
BMP-2(100ng/ml)+VA1	3.32447	0.104467	6.54447	3.22	0.122	3.32447
BMP-2(100ng/ml)+C07	3.79654	-0.163461	7.75654	3.96	0.266	3.79654
BMP-2(200ng/ml)	2.52262	0.372624	4.67262	2.15	0.215	2.52262
BMP-2(200ng/ml)+F1	4.51769	0.0876906	8.94769	4.43	0.443	4.51769
BMP-2(200ng/ml)+VA1	6.22938	-0.250617	12.7094	6.48	0.148	6.22938
BMP-2(200ng/ml)+C07	9.46385	-0.0261487	18.9539	9.49	0.249	9.46385
