# Supplementary material for: Sclerostin small-molecule inhibitors promote osteogenesis by activating canonical Wnt and BMP pathways
Source: eLife. 2023 Aug 10;12:e63402. doi: 10.7554/eLife.63402 (PMC10431921; doi:10.7554/eLife.63402)
Supplement: Figure 4—source data 1. [file elife-63402-fig4-data1.xlsx]

## Sheet:  Analysis 1
	18 s Ct	Mean 18S	AXIN2	Mean AXIN2	AXIN2-18 S	Mean NT	Normalization	2^-(CT)	Mean 2^-(CT)	Std.DEV.	SEM
NT	5.16634		30.8049		25.6386		0.416355	0.749315
NT	5.19995	5.18314	30.0058	30.4053	24.8058	25.2222	-0.416355	1.33455	1.04193	0.413824	0.292618
B2 35ng/ml	5.29041		26.3291		21.0387		-4.18351	18.1704
B2 35ng/ml	5.33074	5.31058	26.6326	26.4809	21.3019		-3.92034	15.1405	16.6555	2.1424	1.51491
B2 + F1 10um	5.81249		25.1233		19.3108		-5.91139	60.1876
B2 + F1 10uM	5.48706	5.64977	24.8389	24.9811	19.3518		-5.87036	58.5	59.3438	1.19332	0.843807
B2+ VA1 10uM	5.5352		24.4671		18.9319		-6.29031	78.2655
B2+ VA1 10uM	5.91485	5.72503	24.2621	24.3646	18.3472		-6.87495	117.373	97.8192	27.6531	19.5537
B2 + CO7 10uM	5.6231		23.6757		18.0526		-7.16961	143.968
B2 + CO7 10uM	5.72456	5.67383	23.8118	23.7437	18.0872		-7.13496	140.552	142.26	2.41519	1.7078
	18 s Ct	Mean 18S	ID1	Mean ID1	ID1-18 S	Mean NT	Normalization	2^-(CT)	Mean 2^-(CT)	Std.DEV.	SEM
NT	5.16634		19.7915		14.6252		0.195655	0.873176
NT	5.19995	5.18314	19.4338	19.6127	14.2339	14.4295	-0.195655	1.14524	1.00921	0.192381	0.136034
B2 35ng/ml	5.29041		16.6997		11.4093		-3.02021	8.11288
B2 35ng/ml	5.33074	5.31058	16.7423	16.721	11.4116		-3.01794	8.10013	8.10651	0.00901924	0.00637757
B2 + F1 10um	5.81249		15.9427		10.1302		-4.29929	19.6887
B2 + F1 10uM	5.48706	5.64977	16.184	16.0633	10.6969		-3.73256	13.2927	16.4907	4.52263	3.19798
B2+ VA1 10uM	5.5352		15.9857		10.4505		-3.979	15.7688
B2+ VA1 10uM	5.91485	5.72503	16.1738	16.0798	10.2589		-4.17056	18.0079	16.8884	1.58322	1.11951
B2 + CO7 10uM	5.6231		15.7967		10.1736		-4.2559	19.1054
B2 + CO7 10uM	5.72456	5.67383	16.1699	15.9833	10.4453		-3.98417	15.8253	17.4653	2.31932	1.64
	18 s Ct	Mean 18S	BMP2	Mean BMP2	BMP2-18 S	Mean NT	Normalization	2^-(CT)	Mean 2^-(CT)	Std.DEV.	SEM
NT	5.16634		23.9274		18.7611		-0.033695	1.02363
NT	5.19995	5.18314	24.0284	23.9779	18.8285	18.7948	0.033695	0.976915	1.00027	0.0330328	0.0233577
B2 35ng/ml	5.29041		23.6588		18.3684		-0.426365	1.34384
B2 35ng/ml	5.33074	5.31058	23.4335	23.5461	18.1028		-0.691995	1.61552	1.47968	0.192102	0.135836
B2 + F1 10um	5.81249		23.1916		17.3791		-1.41565	2.66779
B2 + F1 10uM	5.48706	5.64977	23.1942	23.1929	17.7071		-1.08762	2.12522	2.39651	0.383652	0.271283
B2+ VA1 10uM	5.5352		23.024		17.4888		-1.30596	2.47247
B2+ VA1 10uM	5.91485	5.72503	23.1623	23.0932	17.2474		-1.54731	2.92271	2.69759	0.318363	0.225117
B2 + CO7 10uM	5.6231		23.1242		17.5011		-1.29366	2.45148
B2 + CO7 10uM	5.72456	5.67383	23.2219	23.173	17.4973		-1.29742	2.45788	2.45468	0.0045237	0.00319874
	18 s Ct	Mean 18S	ALK	Mean ALK	ALK-18 S	Mean NT	Normalization	2^-(CT)	Mean 2^-(CT)	Std.DEV.	SEM
NT	5.16634		29.6794		24.5131		-0.155295	1.11365
NT	5.19995	5.18314	30.0236	29.8515	24.8236	24.6684	0.155295	0.897949	1.0058	0.152523	0.10785
B2 35ng/ml	5.29041		18.968		13.6776		-10.9908	2034.93
B2 35ng/ml	5.33074	5.31058	18.9624	18.9652	13.6317		-11.0367	2100.76	2067.85	46.5466	32.9134
B2 + F1 10um	5.81249		20.6199		14.8074		-9.86094	929.909
B2 + F1 10uM	5.48706	5.64977	20.7179	20.6689	15.2308		-9.43751	693.386	811.647	167.247	118.261
B2+ VA1 10uM	5.5352		21.6107		16.0755		-8.59285	386.106
B2+ VA1 10uM	5.91485	5.72503	22.2703	21.9405	16.3554		-8.31291	318.005	352.056	48.1551	34.0508
B2 + CO7 10uM	5.6231		21.5811		15.958		-8.71035	418.869
B2 + CO7 10uM	5.72456	5.67383	21.9281	21.7546	16.2035		-8.46481	353.316	386.092	46.353	32.7765
Panel A: LRP6
Panel B: gsk3b
Panel C: b-catenin															ALP is coordinateed to cell cycle. If we're driving differentiation, then that could explain a decrease
Panel D: Axin2
Panel E: BMP2															** NBT/BCIT staining to assess for ALP at a protein level. Add 1 ml to 24-well dish
Panel F: ID1

## Sheet: Analysis 2
	18 s Ct	Mean 18S	B Catenin	Mean B Catenin	B Catenin-18 S	Mean NT	Normalization	2^-(CT)	Mean 2^-(CT)	Std.DEV.	SEM
NT	5.16634		21.1974		16.0311		-0.022395	1.01564
NT	5.19995	5.18314	21.2758	21.2366	16.0758	16.0535	0.022395	0.984597	1.00012	0.0219538	0.0155237
B2 35ng/ml	5.29041		20.5256		15.2352		-0.818265	1.76328
B2 35ng/ml	5.33074	5.31058	20.5135	20.5196	15.1828		-0.870695	1.82854	1.79591	0.0461454	0.0326297
B2 + F1 10um	5.81249		20.165		14.3525		-1.70095	3.25114
B2 + F1 10uM	5.48706	5.64977	20.6841	20.4245	15.197		-0.856415	1.81053	2.53084	1.01866	0.720302
B2+ VA1 10uM	5.5352		20.5716		15.0364		-1.01705	2.02378
B2+ VA1 10uM	5.91485	5.72503	20.6647	20.6181	14.7498		-1.30361	2.46845	2.24612	0.314426	0.222333
B2 + CO7 10uM	5.6231		20.3665		14.7434		-1.31006	2.47951
B2 + CO7 10uM	5.72456	5.67383	20.3959	20.3812	14.6713		-1.38211	2.6065	2.54301	0.089797	0.0634961
	18 s Ct	Mean 18S	LRP6	Mean LRP6	LRP6-18 S	Mean NT	Normalization	2^-(CT)	Mean 2^-(CT)	Std.DEV.	SEM
NT	5.16634		17.631		12.4647		0.108505	0.927549
NT	5.19995	5.18314	17.4476	17.5393	12.2477	12.3562	-0.108505	1.07811	1.00283	0.106463	0.0752809
B2 35ng/ml	5.29041		17.8778		12.5874		0.231235	0.851905
B2 35ng/ml	5.33074	5.31058	17.7614	17.8196	12.4307		0.074505	0.949668	0.900787	0.0691286	0.0488813
B2 + F1 10um	5.81249		18.1566		12.3441		-0.012045	1.00838
B2 + F1 10uM	5.48706	5.64977	18.1441	18.1504	12.657		0.300885	0.811754	0.910069	0.139038	0.0983148
B2+ VA1 10uM	5.5352		18.5581		13.0229		0.666745	0.629926
B2+ VA1 10uM	5.91485	5.72503	18.638	18.5981	12.7232		0.366995	0.775396	0.702661	0.102863	0.0727348
B2 + CO7 10uM	5.6231		18.5919		12.9688		0.612645	0.653997
B2 + CO7 10uM	5.72456	5.67383	18.7468	18.6694	13.0222		0.666085	0.630215	0.642106	0.0168164	0.011891
	18 s Ct	Mean 18S	WNT5a	Mean WNT5a	WNT5a-18 S	Mean NT	Normalization	2^-(CT)	Mean 2^-(CT)	Std.DEV.	SEM
NT	5.16634		29.5467		24.3804		-0.226695	1.17015
NT	5.19995	5.18314	30.0337	29.7902	24.8337	24.6071	0.226695	0.85459	1.01237	0.223135	0.15778
B2 35ng/ml	5.29041		30.9626		25.6722		1.06513	0.477928
B2 35ng/ml	5.33074	5.31058	30.8797	30.9211	25.549		0.941905	0.520545	0.499237	0.0301349	0.0213086
B2 + F1 10um	5.81249		30.6293		24.8168		0.209755	0.864684
B2 + F1 10uM	5.48706	5.64977	31.1095	30.8694	25.6224		1.01538	0.494696	0.67969	0.261621	0.184994
B2+ VA1 10uM	5.5352		29.8808		24.3456		-0.261455	1.19869
B2+ VA1 10uM	5.91485	5.72503	29.8658	29.8733	23.9509		-0.656105	1.57582	1.38725	0.266675	0.188568
B2 + CO7 10uM	5.6231		29.9305		24.3074		-0.299655	1.23085
B2 + CO7 10uM	5.72456	5.67383	29.6404	29.7854	23.9158		-0.691215	1.61464	1.42275	0.271382	0.191896

## Sheet: Analysis 3
	18 s Ct	Mean 18S	WNT1	Mean WNT1	WNT1-18 S	Mean NT	Normalization	2^-(CT)	Mean 2^-(CT)	Std.DEV.	SEM
NT	5.16634		31.4773		26.311		0.165955	0.891338
NT	5.19995	5.18314	31.179	31.3282	25.979	26.145	-0.165955	1.12191	1.00662	0.163038	0.115285
B2 35ng/ml	5.29041		29.5935		24.3031		-1.84192	3.58486
B2 35ng/ml	5.33074	5.31058	29.3719	29.4827	24.0412		-2.10384	4.29853	3.9417	0.504647	0.35684
B2 + F1 10um	5.81249		30.1509		24.3384		-1.80659	3.49816
B2 + F1 10uM	5.48706	5.64977	30.4226	30.2867	24.9355		-1.20946	2.31252	2.90534	0.838373	0.592819
B2+ VA1 10uM	5.5352		30.01		24.4748		-1.6702	3.1826
B2+ VA1 10uM	5.91485	5.72503	30.2715	30.1408	24.3566		-1.78835	3.45421	3.3184	0.192057	0.135805
B2 + CO7 10uM	5.6231		30.0968		24.4737		-1.6713	3.18503
B2 + CO7 10uM	5.72456	5.67383	30.1698	30.1333	24.4452		-1.69976	3.24848	3.21675	0.0448693	0.0317274
	18 s Ct	Mean 18S	WNT2	Mean WNT2	WNT2-18 S	Mean NT	Normalization	2^-(CT)	Mean 2^-(CT)	Std.DEV.	SEM
NT	5.16634		32.4436		27.2773		0.018205	0.987461
NT	5.19995	5.18314	32.4408	32.4422	27.2409	27.2591	-0.018205	1.0127	1.00008	0.0178461	0.0126191
B2 35ng/ml	5.29041		26.2121		20.9217		-6.33737	80.8606
B2 35ng/ml	5.33074	5.31058	26.4528	26.3325	21.1221		-6.137	70.3752	75.6179	7.4143	5.24271
B2 + F1 10um	5.81249		28.2816		22.4691		-4.78995	27.6641
B2 + F1 10uM	5.48706	5.64977	27.1392	27.7104	21.6521		-5.60692	48.736	38.2001	14.9	10.5359
B2+ VA1 10uM	5.5352		27.1749		21.6397		-5.61936	49.158
B2+ VA1 10uM	5.91485	5.72503	27.222	27.1985	21.3072		-5.95191	61.9016	55.5298	9.01108	6.37179
B2 + CO7 10uM	5.6231		27.349		21.7259		-5.53316	46.3069
B2 + CO7 10uM	5.72456	5.67383	27.3322	27.3406	21.6076		-5.65142	50.2627	48.2848	2.79715	1.97788
	18 s Ct	Mean 18S	HDAC1	Mean HDAC1	HDAC1-18 S	Mean NT	Normalization	2^-(CT)	Mean 2^-(CT)	Std.DEV.	SEM
NT	5.16634		30.8		25.6337		0.327505	0.796913
NT	5.19995	5.18314	30.1786	30.4893	24.9786	25.3062	-0.327505	1.25484	1.02588	0.323804	0.228964
B2 35ng/ml	5.29041		27.3539		22.0635		-3.24266	9.46541
B2 35ng/ml	5.33074	5.31058	27.2883	27.3211	21.9576		-3.34859	10.1866	9.82598	0.50993	0.360575
B2 + F1 10um	5.81249		28.6006		22.7881		-2.51804	5.72805
B2 + F1 10uM	5.48706	5.64977	27.9013	28.2509	22.4142		-2.89191	7.42255	6.5753	1.19819	0.847248
B2+ VA1 10uM	5.5352		27.0221		21.4869		-3.81925	14.116
B2+ VA1 10uM	5.91485	5.72503	27.29	27.1561	21.3751		-3.931	15.2528	14.6844	0.803891	0.568436
B2 + CO7 10uM	5.6231		27.0805		21.4574		-3.84875	14.4076
B2 + CO7 10uM	5.72456	5.67383	26.6177	26.8491	20.8931		-4.41301	21.3034	17.8555	4.87612	3.44794
	18 s Ct	Mean 18S	HDAC2	Mean HDAC2	HDAC2-18 S	Mean NT	Normalization	2^-(CT)	Mean 2^-(CT)	Std.DEV.	SEM
NT	5.16634		19.6559		14.4896		0.067255	0.954452
NT	5.19995	5.18314	19.555	19.6054	14.355	14.4223	-0.067255	1.04772	1.00109	0.0659511	0.0466345
B2 35ng/ml	5.29041		19.1337		13.8433		-0.579015	1.49383
B2 35ng/ml	5.33074	5.31058	19.299	19.2163	13.9683		-0.454045	1.36988	1.43185	0.0876482	0.0619766
B2 + F1 10um	5.81249		19.0222		13.2097		-1.21259	2.31754
B2 + F1 10uM	5.48706	5.64977	19.3692	19.1957	13.8821		-0.540165	1.45414	1.88584	0.610518	0.431701
B2+ VA1 10uM	5.5352		19.4883		13.9531		-0.469205	1.38435
B2+ VA1 10uM	5.91485	5.72503	19.4147	19.4515	13.4998		-0.922455	1.89534	1.63984	0.361325	0.255496
B2 + CO7 10uM	5.6231		19.5508		13.9277		-0.494605	1.40893
B2 + CO7 10uM	5.72456	5.67383	19.549	19.5499	13.8244		-0.597865	1.51348	1.46121	0.0739211	0.0522701
	18 s Ct	Mean 18S	GSK3b	Mean GSK3b	GSK3b-18 S	Mean NT	Normalization	2^-(CT)	Mean 2^-(CT)	Std.DEV.	SEM
NT	5.16634		17.0124		11.8461		0.173405	0.886747
NT	5.19995	5.18314	16.6992	16.8558	11.4992	11.6727	-0.173405	1.12772	1.00723	0.170391	0.120485
B2 35ng/ml	5.29041		16.4595		11.1691		-0.503565	1.41771
B2 35ng/ml	5.33074	5.31058	16.6129	16.5362	11.2822		-0.390495	1.31084	1.36428	0.0755681	0.0534347
B2 + F1 10um	5.81249		16.4292		10.6167		-1.05594	2.07908
B2 + F1 10uM	5.48706	5.64977	16.8237	16.6264	11.3366		-0.336015	1.26227	1.67067	0.577575	0.408407
B2+ VA1 10uM	5.5352		16.5048		10.9696		-0.703055	1.62795
B2+ VA1 10uM	5.91485	5.72503	16.6468	16.5758	10.7319		-0.940705	1.91947	1.77371	0.206134	0.145759
B2 + CO7 10uM	5.6231		17.0246		11.4015		-0.271155	1.20677
B2 + CO7 10uM	5.72456	5.67383	16.7933	16.9089	11.0687		-0.603915	1.51984	1.3633	0.221368	0.156531
No Amplification was observed with SOST and WNT3a primers

## Sheet: CT Values
Well	Sample Name	Task	Ct		Well	Sample Name	Task	Ct		Well	Sample Name	Task	Ct		Well	Sample Name	Task	Ct		Well	Sample Name	Task	Ct
A1	NT	18S	5.16634		C1	NT	AXIN2	30.8049		E1	NT	ID1	19.7915		G1	NT	BMP2	23.9274		A1	NT	ALK	29.6794
A2	NT	18S	5.19995		C2	NT	AXIN2	30.0058		E2	NT	ID1	19.4338		G2	NT	BMP2	24.0284		A2	NT	ALK	30.0236
A3	B2 35ng/ml	18S	5.29041		C3	B2 35ng/ml	AXIN2	26.3291		E3	B2 35ng/ml	ID1	16.6997		G3	B2 35ng/ml	BMP2	23.6588		A3	B2 35ng/ml	ALK	18.968
A4	B2 35ng/ml	18S	5.33074		C4	B2 35ng/ml	AXIN2	26.6326		E4	B2 35ng/ml	ID1	16.7423		G4	B2 35ng/ml	BMP2	23.4335		A4	B2 35ng/ml	ALK	18.9624
A5	B2 + F1 10um	18S	5.81249		C5	B2 + F1 10um	AXIN2	25.1233		E5	B2 + F1 10um	ID1	15.9427		G5	B2 + F1 10um	BMP2	23.1916		A5	B2 + F1 10um	ALK	20.6199
A6	B2 + F1 10uM	18S	5.48706		C6	B2 + F1 10uM	AXIN2	24.8389		E6	B2 + F1 10uM	ID1	16.184		G6	B2 + F1 10uM	BMP2	23.1942		A6	B2 + F1 10uM	ALK	20.7179
A7	B2+ VA1 10uM	18S	5.5352		C7	B2+ VA1 10uM	AXIN2	24.4671		E7	B2+ VA1 10uM	ID1	15.9857		G7	B2+ VA1 10uM	BMP2	23.024		A7	B2+ VA1 10uM	ALK	21.6107
A8	B2+ VA1 10uM	18S	5.91485		C8	B2+ VA1 10uM	AXIN2	24.2621		E8	B2+ VA1 10uM	ID1	16.1738		G8	B2+ VA1 10uM	BMP2	23.1623		A8	B2+ VA1 10uM	ALK	22.2703
A9	B2 + CO7 10uM	18S	5.6231		C9	B2 + CO7 10uM	AXIN2	23.6757		E9	B2 + CO7 10uM	ID1	15.7967		G9	B2 + CO7 10uM	BMP2	23.1242		A9	B2 + CO7 10uM	ALK	21.5811
A10	B2 + CO7 10uM	18S	5.72456		C10	B2 + CO7 10uM	AXIN2	23.8118		E10	B2 + CO7 10uM	ID1	16.1699		G10	B2 + CO7 10uM	BMP2	23.2219		A10	B2 + CO7 10uM	ALK	21.9281
Well	Sample Name	Task	Ct		Well	Sample Name	Task	Ct		Well	Sample Name	Task	Ct		Well	Sample Name	Task	Ct		Well	Sample Name	Task	Ct
E1	NT	B Catenin	21.1974		G1	NT	LRP6	17.631		A1	NT	WNT5a	29.5467		E1	NT	WNT1	31.4773		G1	NT	WNT2	32.4436
E2	NT	B Catenin	21.2758		G2	NT	LRP6	17.4476		A2	NT	WNT5a	30.0337		E2	NT	WNT1	31.179		G2	NT	WNT2	32.4408
E3	B2 35ng/ml	B Catenin	20.5256		G3	B2 35ng/ml	LRP6	17.8778		A3	B2 35ng/ml	WNT5a	30.9626		E3	B2 35ng/ml	WNT1	29.5935		G3	B2 35ng/ml	WNT2	26.2121
E4	B2 35ng/ml	B Catenin	20.5135		G4	B2 35ng/ml	LRP6	17.7614		A4	B2 35ng/ml	WNT5a	30.8797		E4	B2 35ng/ml	WNT1	29.3719		G4	B2 35ng/ml	WNT2	26.4528
E5	B2 + F1 10um	B Catenin	20.165		G5	B2 + F1 10um	LRP6	18.1566		A5	B2 + F1 10um	WNT5a	30.6293		E5	B2 + F1 10um	WNT1	30.1509		G5	B2 + F1 10um	WNT2	28.2816
E6	B2 + F1 10uM	B Catenin	20.6841		G6	B2 + F1 10uM	LRP6	18.1441		A6	B2 + F1 10uM	WNT5a	31.1095		E6	B2 + F1 10uM	WNT1	30.4226		G6	B2 + F1 10uM	WNT2	27.1392
E7	B2+ VA1 10uM	B Catenin	20.5716		G7	B2+ VA1 10uM	LRP6	18.5581		A7	B2+ VA1 10uM	WNT5a	29.8808		E7	B2+ VA1 10uM	WNT1	30.01		G7	B2+ VA1 10uM	WNT2	27.1749
E8	B2+ VA1 10uM	B Catenin	20.6647		G8	B2+ VA1 10uM	LRP6	18.638		A8	B2+ VA1 10uM	WNT5a	29.8658		E8	B2+ VA1 10uM	WNT1	30.2715		G8	B2+ VA1 10uM	WNT2	27.222
E9	B2 + CO7 10uM	B Catenin	20.3665		G9	B2 + CO7 10uM	LRP6	18.5919		A9	B2 + CO7 10uM	WNT5a	29.9305		E9	B2 + CO7 10uM	WNT1	30.0968		G9	B2 + CO7 10uM	WNT2	27.349
E10	B2 + CO7 10uM	B Catenin	20.3959		G10	B2 + CO7 10uM	LRP6	18.7468		A10	B2 + CO7 10uM	WNT5a	29.6404		E10	B2 + CO7 10uM	WNT1	30.1698		G10	B2 + CO7 10uM	WNT2	27.3322
Well	Sample Name	Task	Ct		Well	Sample Name	Task	Ct		Well	Sample Name	Task	Ct
A1	NT	HDAC1	30.8		C1	NT	HDAC2	19.6559		A1	NT	GSK3b	17.0124
A2	NT	HDAC1	30.1786		C2	NT	HDAC2	19.555		A2	NT	GSK3b	16.6992
A3	B2 35ng/ml	HDAC1	27.3539		C3	B2 35ng/ml	HDAC2	19.1337		A3	B2 35ng/ml	GSK3b	16.4595
A4	B2 35ng/ml	HDAC1	27.2883		C4	B2 35ng/ml	HDAC2	19.299		A4	B2 35ng/ml	GSK3b	16.6129
A5	B2 + F1 10um	HDAC1	28.6006		C5	B2 + F1 10um	HDAC2	19.0222		A5	B2 + F1 10um	GSK3b	16.4292
A6	B2 + F1 10uM	HDAC1	27.9013		C6	B2 + F1 10uM	HDAC2	19.3692		A6	B2 + F1 10uM	GSK3b	16.8237
A7	B2+ VA1 10uM	HDAC1	27.0221		C7	B2+ VA1 10uM	HDAC2	19.4883		A7	B2+ VA1 10uM	GSK3b	16.5048
A8	B2+ VA1 10uM	HDAC1	27.29		C8	B2+ VA1 10uM	HDAC2	19.4147		A8	B2+ VA1 10uM	GSK3b	16.6468
A9	B2 + CO7 10uM	HDAC1	27.0805		C9	B2 + CO7 10uM	HDAC2	19.5508		A9	B2 + CO7 10uM	GSK3b	17.0246
A10	B2 + CO7 10uM	HDAC1	26.6177		C10	B2 + CO7 10uM	HDAC2	19.549		A10	B2 + CO7 10uM	GSK3b	16.7933
