# Supplementary material for: Sclerostin small-molecule inhibitors promote osteogenesis by activating canonical Wnt and BMP pathways
Source: eLife. 2023 Aug 10;12:e63402. doi: 10.7554/eLife.63402 (PMC10431921; doi:10.7554/eLife.63402)
Supplement: Figure 6—source data 3. [file elife-63402-fig6-data3.xlsx]

## Sheet: RANKL
	18 s Ct	Mean 18S	RANKL	Mean RANKL	RANKL-18 S	Mean NT	Normalization	2^-(CT)	Mean 2^-(CT)	Std.DEV.	SEM
NT	9.40864		32.5202		23.1116		-0.146025	1.10652						Mean fold changes of OPG and RANKL
NT	9.45439	9.43152	32.858	32.6891	23.4036	23.2576	0.146025	0.903737	1.00513	0.143387	0.10139		Sample	RANKL	OPG	OPG/RANKL	RANKL/OPG	SEM RANKL	SEM OPG	AVERAGE SEM
B2 40ng/ml	9.42264		30.3084		20.8858		-2.37183	5.17595					NT	1.00513	1.00067	0.995568	1.00445	0.10139	0.0366584	0.069024
B2 40ng/ml	9.4825	9.45257	30.4742	30.3913	20.9917		-2.26588	4.80949	4.99272	0.259127	0.183231		B2 40ng/ml	4.99272	1.78617	0.357755	2.79521	0.183231	0.25341	0.21832
F1 7.5µM +B2 40ng/ml	9.44123		30.2118		20.7706		-2.48701	5.60617					F1 7.5µM +B2 40ng/ml	5.1989	0.244369	0.047004	21.2748	0.407272	0.0197325	0.213502
F1 7.5µM +B2 40ng/ml	9.42833	9.43478	30.4254	30.3186	20.9971		-2.26051	4.79162	5.1989	0.575969	0.407272		VA1 7.5µM +B2 40ng/ml	4.02834	0.699887	0.173741	5.7557	0.457149	0.00860083	0.232875
VA1 7.5µM +B2 40ng/ml	9.36762		30.7888		21.4212		-1.8364	3.57119					CO7 7.5µM +B2 40ng/ml	0.890096	1.37942	1.54974	0.64527	0.0796007	0.272746	0.176173
VA1 7.5µM +B2 40ng/ml	9.43168	9.39965	30.524	30.6564	21.0923		-2.16526	4.48549	4.02834	0.646506	0.457149		F1 7.5µM	4.1618	0.355233	0.0853556	11.7157	0.144194	0.0106351	0.0774143
CO7 7.5µM +B2 40ng/ml	9.50719		33.0679		23.5607		0.303125	0.810495					VA1 7.5µM	1.92802	0.529376	0.274571	3.64205	0.215835	0.0667065	0.141271
CO7 7.5µM +B2 40ng/ml	9.51872	9.51295	32.8207	32.9443	23.302		0.044395	0.969696	0.890096	0.112572	0.0796007		CO7 7.5µM	1.16153	1.14551	0.986206	1.01399	0.255653	0.0671196	0.161386
F1 7.5µM	9.49576		30.647		21.1512		-2.10635	4.30599
F1 7.5µM	9.62525	9.5605	30.8765	30.7617	21.2512		-2.00633	4.0176	4.1618	0.20392	0.144194
VA1 7.5µM	9.39085		31.8726		22.4817		-0.775835	1.71218
VA1 7.5µM	9.41022	9.40054	31.5676	31.7201	22.1574		-1.10021	2.14385	1.92802	0.305237	0.215835
CO7 7.5µM	9.3729		32.7731		23.4002		0.142615	0.905876
CO7 7.5µM	9.40784	9.39037	32.1624	32.4677	22.7546		-0.503025	1.41718	1.16153	0.361548	0.255653

## Sheet: OPG
	18 s Ct	Mean 18S	OPG	Mean OPG	OPG-18 S	Mean NT	Normalization	2^-(CT)	Mean 2^-(CT)	Std.DEV.	SEM
NT	9.40864		18.5701		9.16146		-0.052875	1.03733
NT	9.45439	9.43152	18.7216	18.6458	9.26721	9.21433	0.052875	0.964013	1.00067	0.0518428	0.0366584
B2 40ng/ml	9.42264		17.6087		8.18606		-1.02827	2.03958
B2 40ng/ml	9.4825	9.45257	18.0807	17.8447	8.5982		-0.616135	1.53276	1.78617	0.358376	0.25341
F1 7.5µM +B2 40ng/ml	9.44123		20.5764		11.1352		1.92084	0.264102
F1 7.5µM +B2 40ng/ml	9.42833	9.43478	20.797	20.6867	11.3687		2.15434	0.224637	0.244369	0.027906	0.0197325
VA1 7.5µM +B2 40ng/ml	9.36762		19.1146		9.74698		0.532645	0.691286
VA1 7.5µM +B2 40ng/ml	9.43168	9.39965	19.1432	19.1289	9.71152		0.497185	0.708488	0.699887	0.0121634	0.00860083
CO7 7.5µM +B2 40ng/ml	9.50719		18.5753		9.06811		-0.146225	1.10667
CO7 7.5µM +B2 40ng/ml	9.51872	9.51295	18.0087	18.292	8.48998		-0.724355	1.65216	1.37942	0.385721	0.272746
F1 7.5µM	9.49576		20.1607		10.6649		1.4506	0.365868
F1 7.5µM	9.62525	9.5605	20.3766	20.2687	10.7514		1.53702	0.344598	0.355233	0.0150403	0.0106351
VA1 7.5µM	9.39085		19.3516		9.96075		0.746415	0.596083
VA1 7.5µM	9.41022	9.40054	19.7365	19.544	10.3263		1.11195	0.46267	0.529376	0.0943373	0.0667065
CO7 7.5µM	9.3729		18.3091		8.9362		-0.278135	1.21263
CO7 7.5µM	9.40784	9.39037	18.5133	18.4112	9.10546		-0.108875	1.07839	1.14551	0.0949215	0.0671196

## Sheet: LRP6
	18 s Ct	Mean 18S	LRP6	Mean LRP6	LRP6-18 S	Mean NT	Normalization	2^-(CT)	Mean 2^-(CT)	Std.DEV.	SEM
NT	9.40864		18.0778		8.66916		0.025475	0.982497
NT	9.45439	9.43152	18.0726	18.0752	8.61821	8.64369	-0.025475	1.01781	1.00016	0.0249734	0.0176588
B2 40ng/ml	9.42264		18.0639		8.64126		-0.002425	1.00168
B2 40ng/ml	9.4825	9.45257	18.1134	18.0887	8.6309		-0.012785	1.0089	1.00529	0.00510459	0.00360949
F1 7.5µM +B2 40ng/ml	9.44123		18.52		9.07877		0.435085	0.73965
F1 7.5µM +B2 40ng/ml	9.42833	9.43478	18.4615	18.4907	9.03317		0.389485	0.763402	0.751526	0.0167951	0.0118759
VA1 7.5µM +B2 40ng/ml	9.36762		18.4511		9.08348		0.439795	0.737239
VA1 7.5µM +B2 40ng/ml	9.43168	9.39965	18.3468	18.3989	8.91512		0.271435	0.828495	0.782867	0.0645275	0.0456279
CO7 7.5µM +B2 40ng/ml	9.50719		18.825		9.31781		0.674125	0.626712
CO7 7.5µM +B2 40ng/ml	9.51872	9.51295	18.8875	18.8562	9.36878		0.725095	0.604957	0.615835	0.0153831	0.0108775
F1 7.5µM	9.49576		18.3812		8.88544		0.241755	0.845716
F1 7.5µM	9.62525	9.5605	18.6477	18.5145	9.02245		0.378765	0.769096	0.807406	0.0541787	0.0383101
VA1 7.5µM	9.39085		18.7169		9.32605		0.682365	0.623143
VA1 7.5µM	9.41022	9.40054	18.1822	18.4496	8.77198		0.128295	0.914912	0.769027	0.206312	0.145885
CO7 7.5µM	9.3729		18.5547		9.1818		0.538115	0.68867
CO7 7.5µM	9.40784	9.39037	18.5375	18.5461	9.12966		0.485975	0.714014	0.701342	0.0179211	0.0126721

## Sheet: B Catenin
	18 s Ct	Mean 18S	β Catenin	Mean β Catenin	β Catenin-18 S	Mean NT	Normalization	2^-(CT)	Mean 2^-(CT)	Std.DEV.	SEM
NT	9.40864		15.5593		6.15066		0.204825	0.867644
NT	9.45439	9.43152	15.1954	15.3773	5.74101	5.94583	-0.204825	1.15255	1.0101	0.201457	0.142451
B2 40ng/ml	9.42264		15.1885		5.76586		-0.179975	1.13286
B2 40ng/ml	9.4825	9.45257	14.9774	15.083	5.4949		-0.450935	1.36693	1.2499	0.165507	0.117031
F1 7.5µM +B2 40ng/ml	9.44123		15.3967		5.95547		0.009635	0.993344
F1 7.5µM +B2 40ng/ml	9.42833	9.43478	14.821	15.1089	5.39267		-0.553165	1.4673	1.23032	0.335138	0.236979
VA1 7.5µM +B2 40ng/ml	9.36762		14.5008		5.13318		-0.812655	1.75644
VA1 7.5µM +B2 40ng/ml	9.43168	9.39965	14.5932	14.547	5.16152		-0.784315	1.72227	1.73936	0.0241593	0.0170832
CO7 7.5µM +B2 40ng/ml	9.50719		15.3		5.79281		-0.153025	1.1119
CO7 7.5µM +B2 40ng/ml	9.51872	9.51295	15.2	15.25	5.68128		-0.264555	1.20127	1.15658	0.063192	0.0446835
F1 7.5µM	9.49576		15.9		6.40424		0.458405	0.72779
F1 7.5µM	9.62525	9.5605	15.7	15.8	6.07475		0.128915	0.914519	0.821155	0.132037	0.0933643
VA1 7.5µM	9.39085		15.1168		5.72595		-0.219885	1.16464
VA1 7.5µM	9.41022	9.40054	14.9224	15.0196	5.51218		-0.433655	1.35065	1.25765	0.131529	0.0930052
CO7 7.5µM	9.3729		15.0139		5.641		-0.304835	1.23528
CO7 7.5µM	9.40784	9.39037	15.2828	15.1484	5.87496		-0.070875	1.05035	1.14282	0.130761	0.0924619

## Sheet: GSK3b
	18 s Ct	Mean 18S	GSK3b	Mean GSK3b	GSK3b-18 S	Mean NT	Normalization	2^-(CT)	Mean 2^-(CT)	Std.DEV.	SEM
NT	9.40864		16.2524		6.84376		0.057725	0.960778
NT	9.45439	9.43152	16.1827	16.2176	6.72831	6.78604	-0.057725	1.04082	1.0008	0.0566005	0.0400226
B2 40ng/ml	9.42264		16.1466		6.72396		-0.062075	1.04397
B2 40ng/ml	9.4825	9.45257	16.1837	16.1652	6.7012		-0.084835	1.06057	1.05227	0.0117381	0.00830012
F1 7.5µM +B2 40ng/ml	9.44123		16.0935		6.65227		-0.133765	1.09715
F1 7.5µM +B2 40ng/ml	9.42833	9.43478	16.2034	16.1484	6.77507		-0.010965	1.00763	1.05239	0.063303	0.0447619
VA1 7.5µM +B2 40ng/ml	9.36762		15.5285		6.16088		-0.625155	1.54238
VA1 7.5µM +B2 40ng/ml	9.43168	9.39965	15.947	15.7377	6.51532		-0.270715	1.20641	1.37439	0.237567	0.167985
CO7 7.5µM +B2 40ng/ml	9.50719		16.1287		6.62151		-0.164525	1.1208
CO7 7.5µM +B2 40ng/ml	9.51872	9.51295	16.1776	16.1532	6.65888		-0.127155	1.09214	1.10647	0.0202651	0.0143296
F1 7.5µM	9.49576		16.3976		6.90184		0.115805	0.922867
F1 7.5µM	9.62525	9.5605	16.181	16.2893	6.55575		-0.230285	1.17307	1.04797	0.176918	0.1251
VA1 7.5µM	9.39085		16.2562		6.86535		0.079315	0.946507
VA1 7.5µM	9.41022	9.40054	16.099	16.1776	6.68878		-0.097255	1.06974	1.00812	0.0871362	0.0616146
CO7 7.5µM	9.3729		15.8838		6.5109		-0.275135	1.21011
CO7 7.5µM	9.40784	9.39037	16.0014	15.9426	6.59356		-0.192475	1.14272	1.17641	0.0476483	0.0336924

## Sheet: BMP2
	18 s Ct	Mean 18S	B2	Mean B2	B2-18 S	Mean NT	Normalization	2^-(CT)	Mean 2^-(CT)	Std.DEV.	SEM
NT	9.40864		21.2599		11.8513		0.056075	0.961877
NT	9.45439	9.43152	21.1935	21.2267	11.7391	11.7952	-0.056075	1.03963	1.00076	0.0549818	0.038878
B2 40ng/ml	9.42264		21.1991		11.7765		-0.018725	1.01306
B2 40ng/ml	9.4825	9.45257	21.0746	21.1369	11.5921		-0.203085	1.15116	1.08211	0.0976469	0.0690468
F1 7.5µM +B2 40ng/ml	9.44123		20.5113		11.0701		-0.725115	1.65303
F1 7.5µM +B2 40ng/ml	9.42833	9.43478	20.5729	20.5421	11.1446		-0.650615	1.56984	1.61143	0.0588279	0.0415976
VA1 7.5µM +B2 40ng/ml	9.36762		20.0211		10.6535		-1.1417	2.20642
VA1 7.5µM +B2 40ng/ml	9.43168	9.39965	19.9875	20.0043	10.5558		-1.23936	2.36095	2.28368	0.109269	0.0772648
CO7 7.5µM +B2 40ng/ml	9.50719		20.0059		10.4987		-1.29647	2.45628
CO7 7.5µM +B2 40ng/ml	9.51872	9.51295	20.1893	20.0976	10.6706		-1.12461	2.18042	2.31835	0.195064	0.137931
F1 7.5µM	9.49576		20.6996		11.2038		-0.591345	1.50665
F1 7.5µM	9.62525	9.5605	20.8828	20.7912	11.2576		-0.537635	1.45159	1.47912	0.0389331	0.0275299
VA1 7.5µM	9.39085		20.3496		10.9587		-0.836435	1.78563
VA1 7.5µM	9.41022	9.40054	20.2996	20.3246	10.8894		-0.905805	1.87359	1.82961	0.0621953	0.0439787
CO7 7.5µM	9.3729		19.994		10.6211		-1.17408	2.2565
CO7 7.5µM	9.40784	9.39037	20.0119	20.0029	10.6041		-1.19112	2.28331	2.2699	0.0189575	0.013405

## Sheet: ID1
	18 s Ct	Mean 18S	ID1	Mean ID1	ID1-18 S	Mean NT	Normalization	2^-(CT)	Mean 2^-(CT)	Std.DEV.	SEM
NT	9.40864		19.6825		10.2739		0.065325	0.95573
NT	9.45439	9.43152	19.5976	19.6401	10.1432	10.2085	-0.065325	1.04632	1.00103	0.0640572	0.0452953
B2 40ng/ml	9.42264		19.1552		9.73256		-0.475975	1.39086
B2 40ng/ml	9.4825	9.45257	19.1628	19.159	9.6803		-0.528235	1.44216	1.41651	0.0362787	0.0256529
F1 7.5µM +B2 40ng/ml	9.44123		19.774		10.3328		0.124235	0.91749
F1 7.5µM +B2 40ng/ml	9.42833	9.43478	19.8567	19.8154	10.4284		0.219835	0.858664	0.888077	0.0415968	0.0294134
VA1 7.5µM +B2 40ng/ml	9.36762		19.6545		10.2869		0.078345	0.947144
VA1 7.5µM +B2 40ng/ml	9.43168	9.39965	19.5079	19.5812	10.0762		-0.132315	1.09605	1.0216	0.105294	0.0744538
CO7 7.5µM +B2 40ng/ml	9.50719		20.2467		10.7395		0.530975	0.692087
CO7 7.5µM +B2 40ng/ml	9.51872	9.51295	20.1587	20.2027	10.64		0.431445	0.741519	0.716803	0.0349536	0.0247159
F1 7.5µM	9.49576		20.0081		10.5123		0.303805	0.810113
F1 7.5µM	9.62525	9.5605	20.1366	20.0724	10.5114		0.302815	0.810669	0.810391	0.000393224	0.000278052
VA1 7.5µM	9.39085		20.0582		10.6673		0.458815	0.727584
VA1 7.5µM	9.41022	9.40054	19.9228	19.9905	10.5126		0.304045	0.809978	0.768781	0.0582618	0.0411973
CO7 7.5µM	9.3729		19.9466		10.5737		0.365165	0.77638
CO7 7.5µM	9.40784	9.39037	20.0912	20.0189	10.6834		0.474825	0.719554	0.747967	0.0401821	0.028413

## Sheet: AXIN2
	18 s Ct	Mean 18S	AXIN2	Mean AXIN2	AXIN2-18 S	Mean NT	Normalization	2^-(CT)	Mean 2^-(CT)	Std.DEV.	SEM
NT	9.40864		25.3596		15.951		-0.420425	1.33832
NT	9.45439	9.43152	26.2462	25.8029	16.7918	16.3714	0.420425	0.747204	1.04276	0.417983	0.295559
B2 40ng/ml	9.42264		23.4827		14.0601		-2.31132	4.96339
B2 40ng/ml	9.4825	9.45257	23.3584	23.4205	13.8759		-2.49549	5.63918	5.30128	0.477857	0.337896
F1 7.5µM +B2 40ng/ml	9.44123		18.2785		8.83727		-7.53411	185.351
F1 7.5µM +B2 40ng/ml	9.42833	9.43478	18.1068	18.1927	8.67847		-7.69292	206.918	196.134	15.2502	10.7835
VA1 7.5µM +B2 40ng/ml	9.36762		16.5513		7.18368		-9.1877	583.143
VA1 7.5µM +B2 40ng/ml	9.43168	9.39965	16.781	16.6662	7.34932		-9.02207	519.891	551.517	44.7258	31.6259
CO7 7.5µM +B2 40ng/ml	9.50719		16.3529		6.84571		-9.52567	737.079
CO7 7.5µM +B2 40ng/ml	9.51872	9.51295	16.2916	16.3223	6.77288		-9.59851	775.243	756.161	26.9863	19.0822
F1 7.5µM	9.49576		18.3103		8.81454		-7.55684	188.294
F1 7.5µM	9.62525	9.5605	18.8658	18.5881	9.24055		-7.13083	140.151	164.222	34.0426	24.0718
VA1 7.5µM	9.39085		16.7483		7.35745		-9.01394	516.969
VA1 7.5µM	9.41022	9.40054	16.5	16.6242	7.08978		-9.28161	622.36	569.665	74.5223	52.6952
CO7 7.5µM	9.3729		15.9468		6.5739		-9.79748	889.891
CO7 7.5µM	9.40784	9.39037	16.0708	16.0088	6.66296		-9.70843	836.618	863.254	37.6699	26.6366

## Sheet: CT Values
Well	Sample Name	Task	Ct		Well	Sample Name	Task	Ct		Well	Sample Name	Task	Ct		Well	Sample Name	Task	Ct
A1	NT	18S	9.40864		C1	NT	AXIN2	25.3596		E1	NT	ID1	19.6825		G1	NT	BMP2	21.2599
A2	NT	18S	9.45439		C2	NT	AXIN2	26.2462		E2	NT	ID1	19.5976		G2	NT	BMP2	21.1935
A3	B2 40ng/ml	18S	9.42264		C3	B2 40ng/ml	AXIN2	23.4827		E3	B2 40ng/ml	ID1	19.1552		G3	B2 40ng/ml	BMP2	21.1991
A4	B2 40ng/ml	18S	9.4825		C4	B2 40ng/ml	AXIN2	23.3584		E4	B2 40ng/ml	ID1	19.1628		G4	B2 40ng/ml	BMP2	21.0746
A5	F1 7.5µM +B2 40ng/ml	18S	9.44123		C5	F1 7.5µM +B2 40ng/ml	AXIN2	18.2785		E5	F1 7.5µM +B2 40ng/ml	ID1	19.774		G5	F1 7.5µM +B2 40ng/ml	BMP2	20.5113
A6	F1 7.5µM +B2 40ng/ml	18S	9.42833		C6	F1 7.5µM +B2 40ng/ml	AXIN2	18.1068		E6	F1 7.5µM +B2 40ng/ml	ID1	19.8567		G6	F1 7.5µM +B2 40ng/ml	BMP2	20.5729
A7	VA1 7.5µM +B2 40ng/ml	18S	9.36762		C7	VA1 7.5µM +B2 40ng/ml	AXIN2	16.5513		E7	VA1 7.5µM +B2 40ng/ml	ID1	19.6545		G7	VA1 7.5µM +B2 40ng/ml	BMP2	20.0211
A8	VA1 7.5µM +B2 40ng/ml	18S	9.43168		C8	VA1 7.5µM +B2 40ng/ml	AXIN2	16.781		E8	VA1 7.5µM +B2 40ng/ml	ID1	19.5079		G8	VA1 7.5µM +B2 40ng/ml	BMP2	19.9875
A9	CO7 7.5µM +B2 40ng/ml	18S	9.50719		C9	CO7 7.5µM +B2 40ng/ml	AXIN2	16.3529		E9	CO7 7.5µM +B2 40ng/ml	ID1	20.2467		G9	CO7 7.5µM +B2 40ng/ml	BMP2	20.0059
A10	CO7 7.5µM +B2 40ng/ml	18S	9.51872		C10	CO7 7.5µM +B2 40ng/ml	AXIN2	16.2916		E10	CO7 7.5µM +B2 40ng/ml	ID1	20.1587		G10	CO7 7.5µM +B2 40ng/ml	BMP2	20.1893
A11	F1 7.5µM	18S	9.49576		C11	F1 7.5µM	AXIN2	18.3103		E11	F1 7.5µM	ID1	20.0081		G11	F1 7.5µM	BMP2	20.6996
A12	F1 7.5µM	18S	9.62525		C12	F1 7.5µM	AXIN2	18.8658		E12	F1 7.5µM	ID1	20.1366		G12	F1 7.5µM	BMP2	20.8828
B1	VA1 7.5µM	18S	9.39085		D1	VA1 7.5µM	AXIN2	16.7483		F1	VA1 7.5µM	ID1	20.0582		H1	VA1 7.5µM	BMP2	20.3496
B2	VA1 7.5µM	18S	9.41022		D2	VA1 7.5µM	AXIN2	16.5		F2	VA1 7.5µM	ID1	19.9228		H2	VA1 7.5µM	BMP2	20.2996
B3	CO7 7.5µM	18S	9.3729		D3	CO7 7.5µM	AXIN2	15.9468		F3	CO7 7.5µM	ID1	19.9466		H3	CO7 7.5µM	BMP2	19.994
B4	CO7 7.5µM	18S	9.40784		D4	CO7 7.5µM	AXIN2	16.0708		F4	CO7 7.5µM	ID1	20.0912		H4	CO7 7.5µM	BMP2	20.0119
Well	Sample Name	Task	Ct		Well	Sample Name	Task	Ct		Well	Sample Name	Task	Ct		Well	Sample Name	Task	Ct
C1	NT	GSK3b	16.2524		E1	NT	β Catenin	15.5593		G1	NT	LRP6	18.0778		B5	NT	OPG	18.5701
C2	NT	GSK3b	16.1827		E2	NT	β Catenin	15.1954		G2	NT	LRP6	18.0726		B6	NT	OPG	18.7216
C3	B2 40ng/ml	GSK3b	16.1466		E3	B2 40ng/ml	β Catenin	15.1885		G3	B2 40ng/ml	LRP6	18.0639		B7	B2 40ng/ml	OPG	17.6087
C4	B2 40ng/ml	GSK3b	16.1837		E4	B2 40ng/ml	β Catenin	14.9774		G4	B2 40ng/ml	LRP6	18.1134		B8	B2 40ng/ml	OPG	18.0807
C5	F1 7.5µM +B2 40ng/ml	GSK3b	16.0935		E5	F1 7.5µM +B2 40ng/ml	β Catenin	15.3967		G5	F1 7.5µM +B2 40ng/ml	LRP6	18.52		B9	F1 7.5µM +B2 40ng/ml	OPG	20.5764
C6	F1 7.5µM +B2 40ng/ml	GSK3b	16.2034		E6	F1 7.5µM +B2 40ng/ml	β Catenin	14.821		G6	F1 7.5µM +B2 40ng/ml	LRP6	18.4615		B10	F1 7.5µM +B2 40ng/ml	OPG	20.797
C7	VA1 7.5µM +B2 40ng/ml	GSK3b	15.5285		E7	VA1 7.5µM +B2 40ng/ml	β Catenin	14.5008		G7	VA1 7.5µM +B2 40ng/ml	LRP6	18.4511		B11	VA1 7.5µM +B2 40ng/ml	OPG	19.1146
C8	VA1 7.5µM +B2 40ng/ml	GSK3b	15.947		E8	VA1 7.5µM +B2 40ng/ml	β Catenin	14.5932		G8	VA1 7.5µM +B2 40ng/ml	LRP6	18.3468		B12	VA1 7.5µM +B2 40ng/ml	OPG	19.1432
C9	CO7 7.5µM +B2 40ng/ml	GSK3b	16.1287		E9	CO7 7.5µM +B2 40ng/ml	β Catenin	15.3		G9	CO7 7.5µM +B2 40ng/ml	LRP6	18.825		D5	CO7 7.5µM +B2 40ng/ml	OPG	18.5753
C10	CO7 7.5µM +B2 40ng/ml	GSK3b	16.1776		E10	CO7 7.5µM +B2 40ng/ml	β Catenin	15.2		G10	CO7 7.5µM +B2 40ng/ml	LRP6	18.8875		D6	CO7 7.5µM +B2 40ng/ml	OPG	18.0087
C11	F1 7.5µM	GSK3b	16.3976		E11	F1 7.5µM	β Catenin	15.9		G11	F1 7.5µM	LRP6	18.3812		D7	F1 7.5µM	OPG	20.1607
C12	F1 7.5µM	GSK3b	16.181		E12	F1 7.5µM	β Catenin	15.7		G12	F1 7.5µM	LRP6	18.6477		D8	F1 7.5µM	OPG	20.3766
D1	VA1 7.5µM	GSK3b	16.2562		F1	VA1 7.5µM	β Catenin	15.1168		H1	VA1 7.5µM	LRP6	18.7169		D9	VA1 7.5µM	OPG	19.3516
D2	VA1 7.5µM	GSK3b	16.099		F2	VA1 7.5µM	β Catenin	14.9224		H2	VA1 7.5µM	LRP6	18.1822		D10	VA1 7.5µM	OPG	19.7365
D3	CO7 7.5µM	GSK3b	15.8838		F3	CO7 7.5µM	β Catenin	15.0139		H3	CO7 7.5µM	LRP6	18.5547		D11	CO7 7.5µM	OPG	18.3091
D4	CO7 7.5µM	GSK3b	16.0014		F4	CO7 7.5µM	β Catenin	15.2828		H4	CO7 7.5µM	LRP6	18.5375		D12	CO7 7.5µM	OPG	18.5133
Well	Sample Name	Task	Ct
A1	NT	RANKL	32.5202
A2	NT	RANKL	32.858
A3	B2 40ng/ml	RANKL	30.3084
A4	B2 40ng/ml	RANKL	30.4742
A5	F1 7.5µM +B2 40ng/ml	RANKL	30.2118
A6	F1 7.5µM +B2 40ng/ml	RANKL	30.4254
A7	VA1 7.5µM +B2 40ng/ml	RANKL	30.7888
A8	VA1 7.5µM +B2 40ng/ml	RANKL	30.524
A9	CO7 7.5µM +B2 40ng/ml	RANKL	33.0679
A10	CO7 7.5µM +B2 40ng/ml	RANKL	32.8207
A11	F1 7.5µM	RANKL	30.647
A12	F1 7.5µM	RANKL	30.8765
B1	VA1 7.5µM	RANKL	31.8726
B2	VA1 7.5µM	RANKL	31.5676
B3	CO7 7.5µM	RANKL	32.7731
B4	CO7 7.5µM	RANKL	32.1624
