# Supplementary material for: Sclerostin small-molecule inhibitors promote osteogenesis by activating canonical Wnt and BMP pathways
Source: eLife. 2023 Aug 10;12:e63402. doi: 10.7554/eLife.63402 (PMC10431921; doi:10.7554/eLife.63402)
Supplement: Figure 6—source data 4. [file elife-63402-fig6-data4.xlsx]

## Sheet: TRF
Treatment	Reading1	Reading2	Reading3	Mean	Std.Dev	Std.Err
No RANKL	2398.6	4292.2	6416.2	4369	2009.9	1160.42
RANKL(20ng/ml)	181275	150238	140462	157325	21309.5	12303
RANKL(20ng/ml)+wnt3a(20ng/ml)	33198	30226	26586	30003.3	3311.62	1911.96
RANKL(20ng/ml)+wnt3a(20ng/ml)+Sclerostin(80ng/ml)	104827	138223	162386	135145	28902.8	16687
RANKL(20ng/ml)+wnt3a(20ng/ml)+Sclerostin(80ng/ml)+F1-5uM	89288	93424	99548	94086.7	5162	2980.28
RANKL(20ng/ml)+wnt3a(20ng/ml)+Sclerostin(80ng/ml)+F1-10uM	62985	72434	82938	72785.7	9981.15	5762.62
RANKL(20ng/ml)+wnt3a(20ng/ml)+Sclerostin(80ng/ml)+VA1-5uM	76678	79908	91231	82605.7	7642.35	4412.31
RANKL(20ng/ml)+wnt3a(20ng/ml)+Sclerostin(80ng/ml)+VA1-10uM	62592	57122	55482	58398.7	3722.96	2149.45
RANKL(20ng/ml)+wnt3a(20ng/ml)+Sclerostin(80ng/ml)+C07-5uM	66358	68690	71362	68803.3	2503.92	1445.64
RANKL(20ng/ml)+wnt3a(20ng/ml)+Sclerostin(80ng/ml)+C07-10uM	44964	46236	49666	46955.3	2432.14	1404.19
RANKL(20ng/ml)+F1-5uM	191275	140238	160485	163999	25699.4	14837.5
RANKL(20ng/ml)+F1-10uM	171384	130438	190632	164151	30741.9	17748.8
RANKL(20ng/ml)+VA1-5uM	141341	180236	160113	160563	19451.4	11230.3
RANKL(20ng/ml)+VA1-10uM	141971	129208	189611	153597	31835.5	18380.2
RANKL(20ng/ml)+C07-5uM	158275	140111	161583	153323	11560.9	6674.66
RANKL(20ng/ml)+C07-10uM	169284	128438	193352	163691	32816.4	18946.6
