# Supplementary material for: Sclerostin small-molecule inhibitors promote osteogenesis by activating canonical Wnt and BMP pathways
Source: eLife. 2023 Aug 10;12:e63402. doi: 10.7554/eLife.63402 (PMC10431921; doi:10.7554/eLife.63402)
Supplement: Table 2—source data 1. [file elife-63402-table2-data1.xlsx]

## Sheet: Sheet1
				Fusion (Yes/No)
		N = 1	N = 2	N = 3	N = 4	N = 5	N = 6	Fusion Rate (%)
	ICBG	No	Yes	Yes	Yes	No	Yes	66
	VA1 + ICBG	Yes	Yes	No	*	Yes	Yes	80
	C07 + ICBG	No	Yes	Yes	Yes	Yes	Yes	83
	Control	No	No	No	No	No	No	0
	VA1	No	No	No	No	Yes	No	17
	C07	No	No	Yes	No	Yes	No	33
	Control	No	No	No	No	No	No	0
	VA1	-	-	-	-	-	-	-
	C07	Yes	No	Yes	Yes	Yes	*	80
